# Supplementary material for: A study of nanogels with different polysiloxane chain lengths for photopolymerization stress reduction and modification of polymer network properties
Source: Royal Society of Chemistry journal article supplement (doi:10.1039/c5ra02394g), 2015-01-01
Supplement: c5ra02394g1.pdf [file c5ra02394g1.pdf]

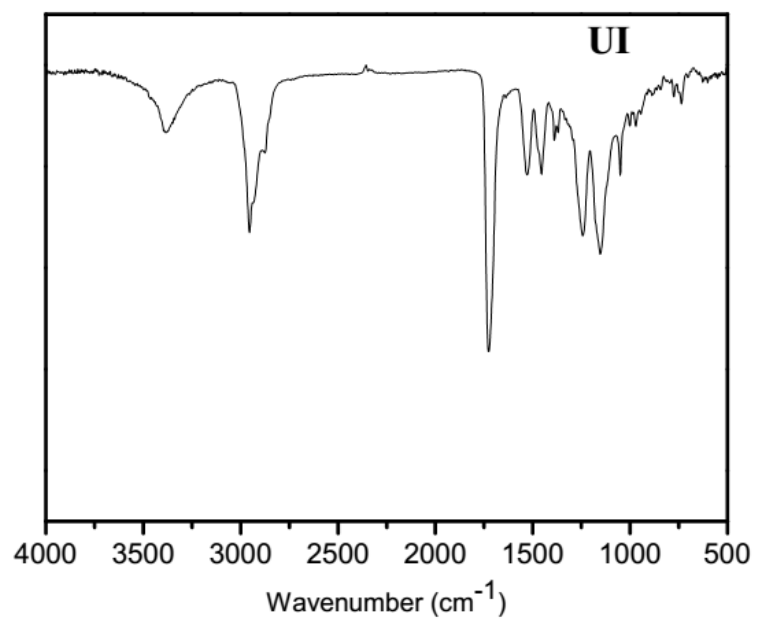

Fig. S2 The FTIR spectra of UI.

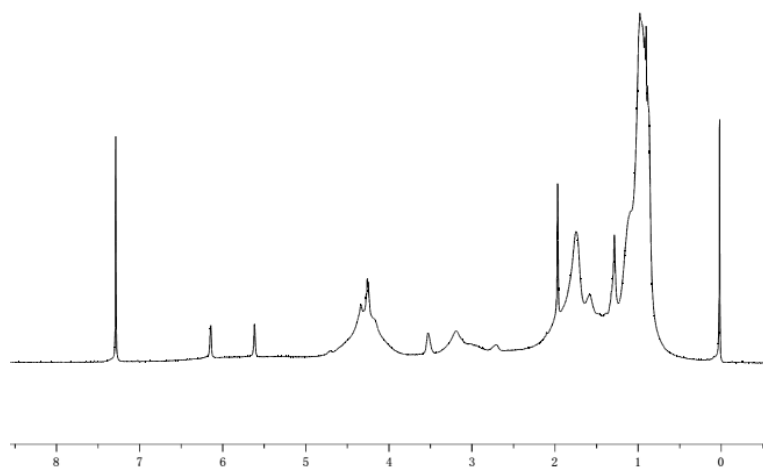

Fig. S3  $^1\text{H}$  NMR spectra of UI.

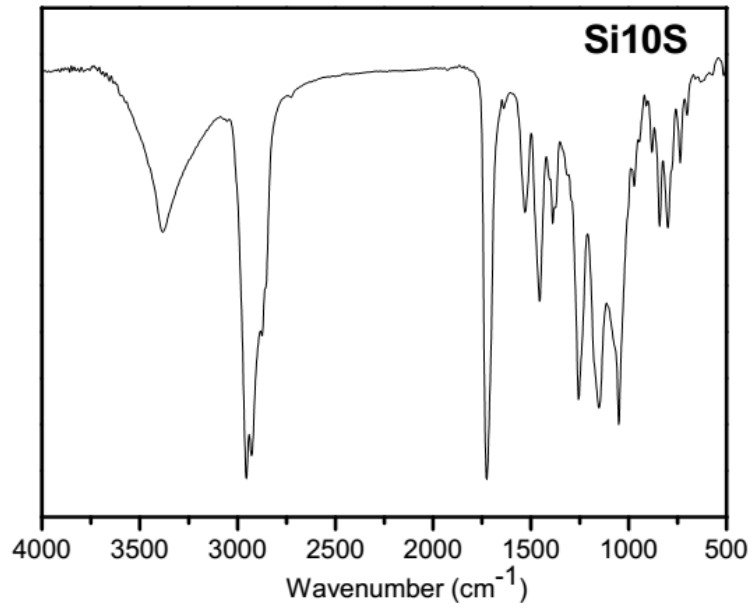

Fig. S4 The FTIR spectra of Si10S.

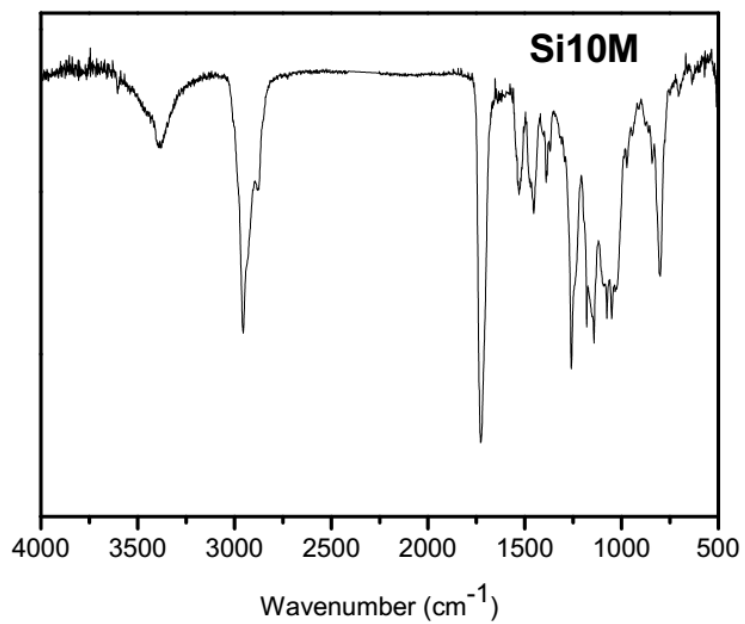

Fig. S5 The FTIR spectra of Si10M.

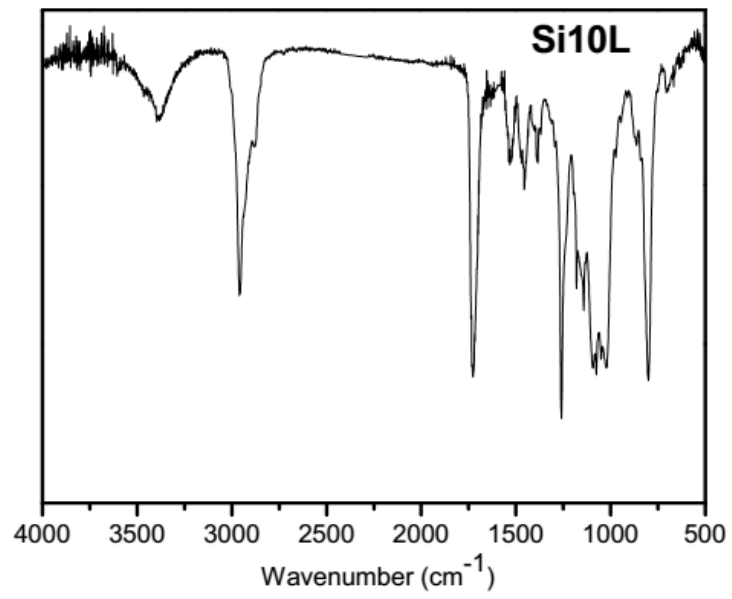

Fig. S6 The FTIR spectra of Si10L.

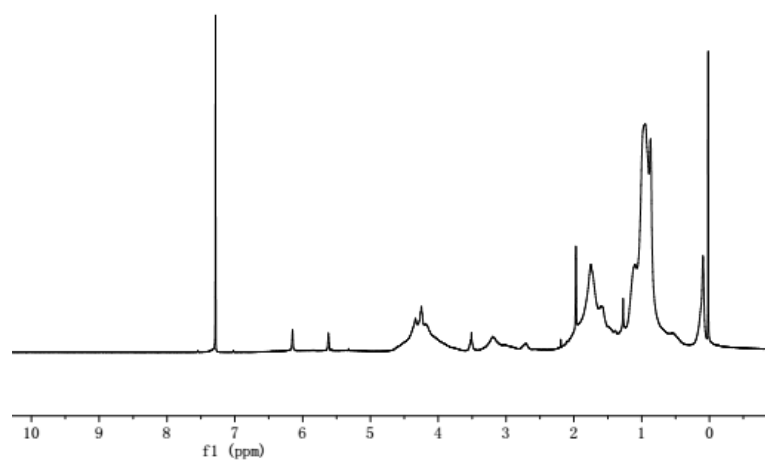

Fig. S7  $^1\text{H}$  NMR spectra of Si10S.

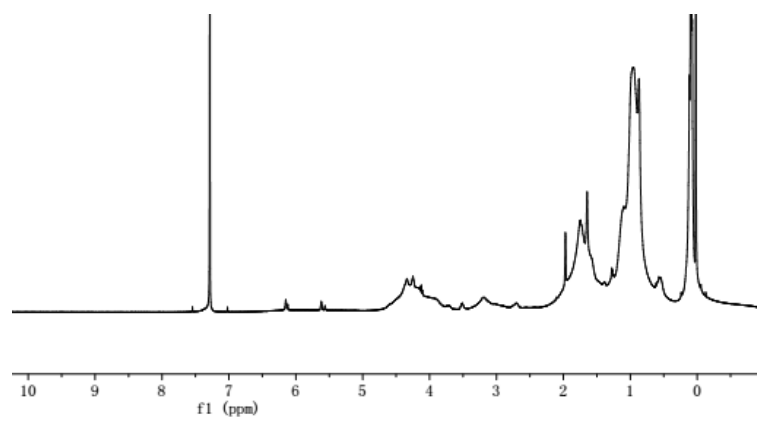

Fig. S8  $^1\text{H}$  NMR spectra of Si10M.



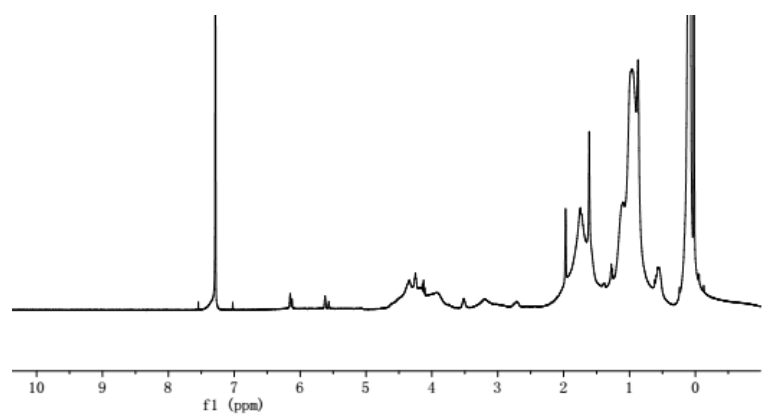

Fig. S9 <sup>1</sup>H NMR spectra of Si10L.

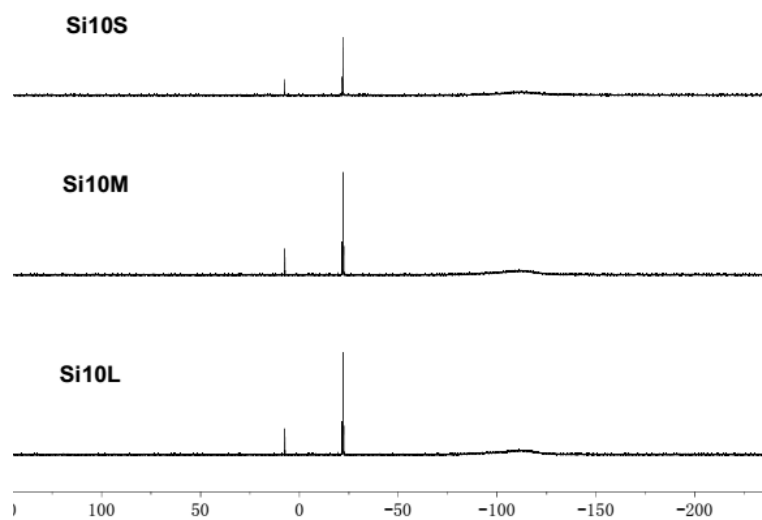

Fig. S10  $^{29}\text{Si}$  NMR spectra of Si10S/M/L.

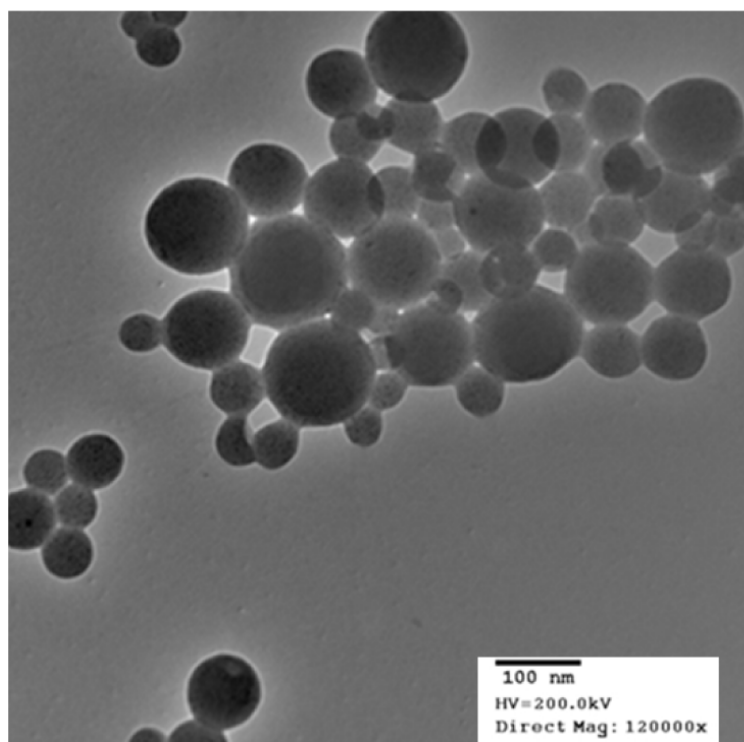

Fig. S11 Transmission electron micrograph of UI.
